# Supplementary material for: Smart electrochemical sensing platform for the simultaneous determination of psychotic disorder drugs isopropamide iodide and trifluoperazine hydrochloride
Source: Royal Society of Chemistry journal article supplement (doi:10.1039/c8nj01600c), 2018-01-01
Supplement: c8nj01600c1.pdf [file c8nj01600c1.pdf]

## Smart Electrochemical Sensing Platform for the Simultaneous Determination of Psychotic Disorders Drugs Isopropamide Iodide and Trifluoperazine Hydrochloride

Mona A. Mohamed <sup>a,b\*</sup>, Ahmed S. Saad <sup>c\*</sup>, Sara H. Koshek <sup>a</sup> and Mohamed R. El-Ghobashy <sup>c</sup>

<sup>a</sup> Pharmaceutical Chemistry Department, National Organization for Drug Control and Research, Pyramids Ave, P.O. Box 29, Giza, Egypt

<sup>b</sup> Institute of Electronics, Microelectronics and Nanotechnology (IEMN, UMR CNRS 8520), Université Lille 1, Cité Scientifique Avenue Poincaré-BP60069, 59652 Villeneuve d'Ascq, France

<sup>c</sup> Cairo University, Faculty of Pharmacy, Analytical Chemistry Department, Kasr Elaini St., P.O. box 11562, Cairo, Egypt.

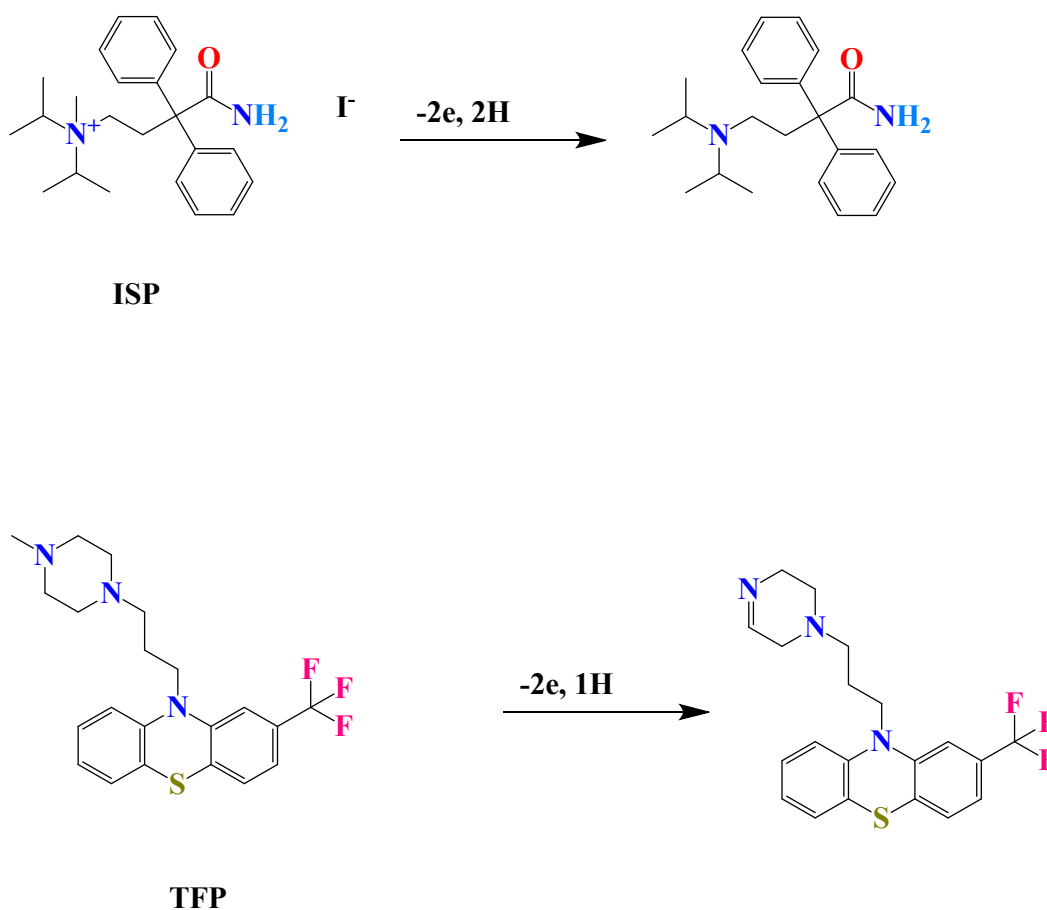

**Scheme S1.** Suggested electrochemical oxidation of ISP and TFP

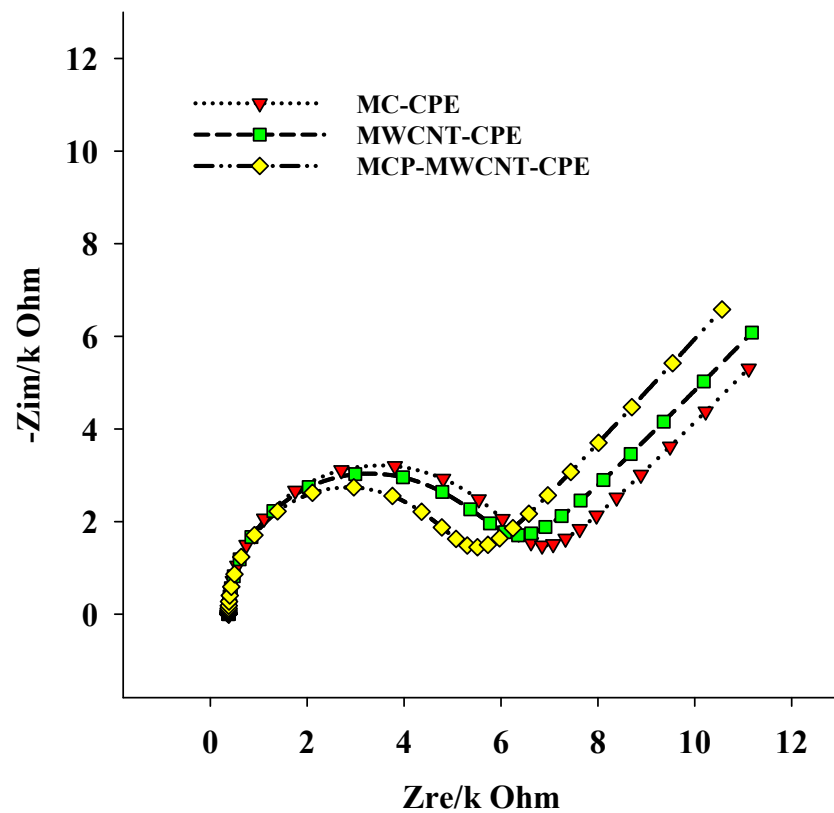

**Figure S1.** Nyquist plots for MC-CPE, MWCNT/CPE, and MC-MWCNT-CPE using the redox probe 5.0 mmol L<sup>-1</sup> K<sub>3</sub>Fe(CN)<sub>6</sub> (1:1) solution.

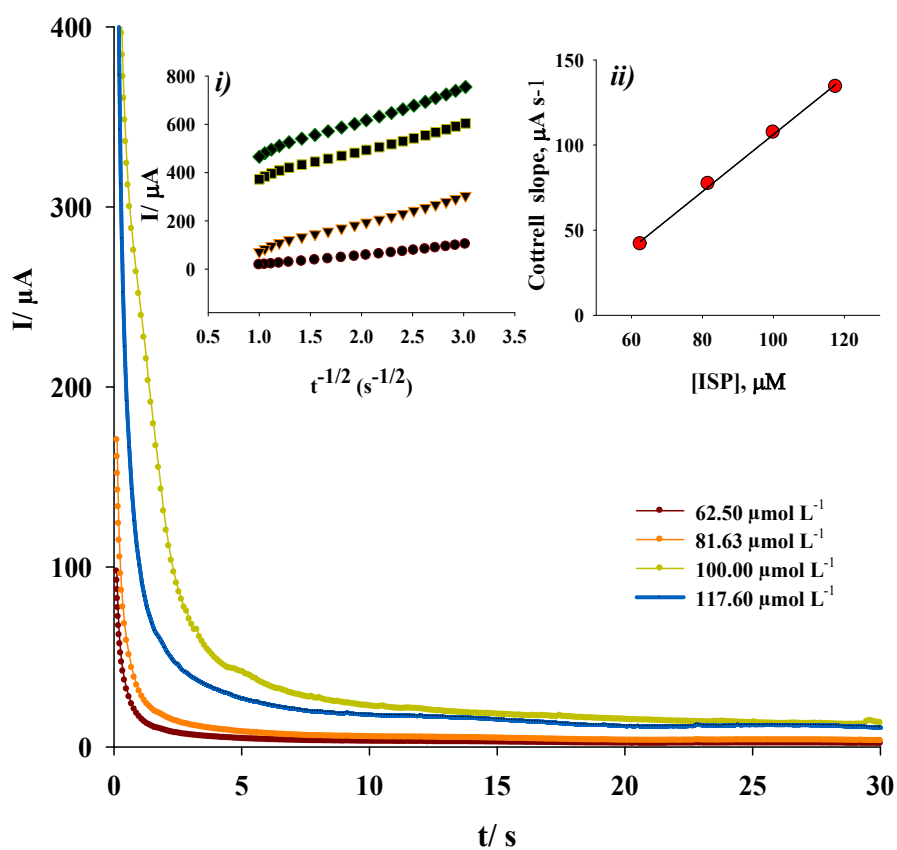

**Figure S2.** Chronoamperograms for the oxidation of different concentrations ISP at MCP-MWCNT/CPE in B-R buffer (pH 4.0), for a potential step of +0.51 V vs. Ag/AgCl. The numbers 1 to 4 in Cottrell's plot (inset *i*) correspond to 62.50, 100.00, 117.60, and 134.60  $\mu\text{mol L}^{-1}$  of ISP, respectively. Inset *ii* shows the variation of chronoamperometric currents at  $t = 30$  s vs. ISP concentration.

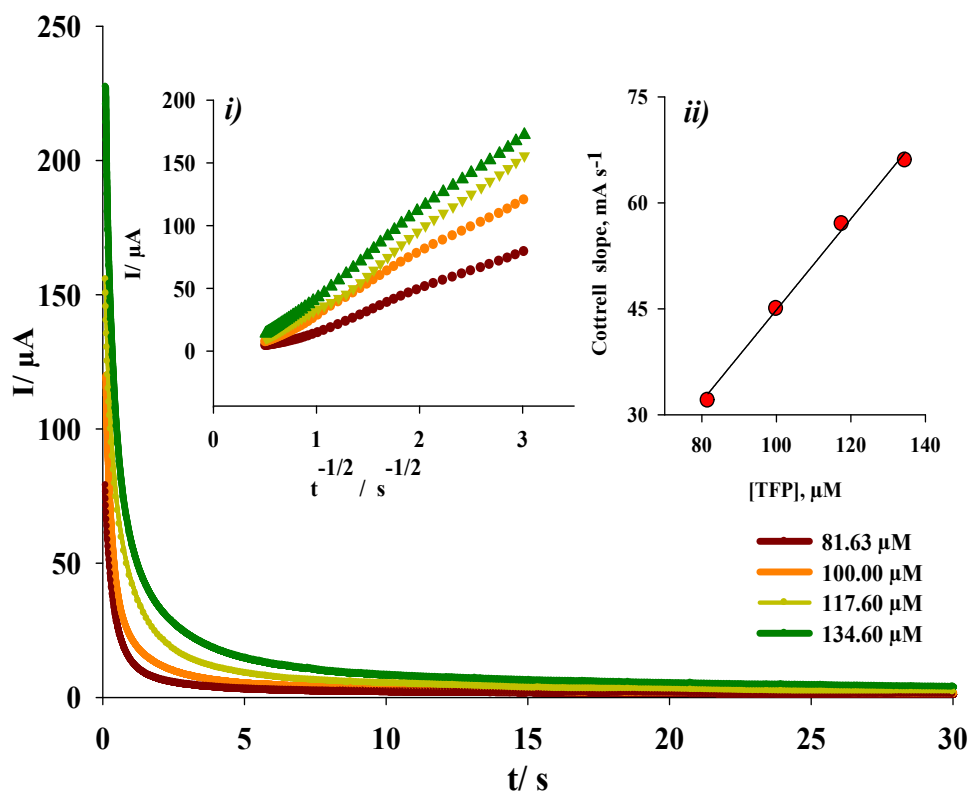

**Figure S3.** Chronoamperograms for the oxidation of different concentrations TFP at MCP-MWCNT/CPE in B–R buffer (pH 4.0), for a potential step of +0.794 V vs. Ag/AgCl. The numbers 1 to 4 in Cottrell's plot (inset *i*) correspond to 81.63, 100.00, 117.60, and 134.60  $\mu\text{mol L}^{-1}$  of TFP, respectively. Inset *ii* shows the variation of chronoamperometric currents at  $t = 30$  s vs. TFP concentration.

**Table S1.** Determination of ISP and TFP in human plasma sample using the new proposed sensing protocol.

| <b>Parameters</b> | <b>Conc. Added<br/>(<math>\mu\text{mol L}^{-1}</math>)</b> | <b>Conc. found<br/>(<math>\mu\text{mol L}^{-1}</math>)</b> | <b>%Recovery*</b> |
|-------------------|------------------------------------------------------------|------------------------------------------------------------|-------------------|
|                   | 12.50                                                      | 12.36                                                      | 98.90             |
| <b><u>ISP</u></b> | 15.50                                                      | 15.75                                                      | 101.61            |
|                   | 20.90                                                      | 20.72                                                      | 99.13             |
|                   | 23.40                                                      | 23.47                                                      | 100.32            |
| %Mean $\pm$ %RSD  |                                                            |                                                            | 99.99 $\pm$ 1.24  |
|                   | 62.24                                                      | 63.30                                                      | 101.75            |
| <b><u>TFP</u></b> | 77.50                                                      | 75.80                                                      | 97.75             |
|                   | 105.00                                                     | 105.80                                                     | 100.73            |
|                   | 117.00                                                     | 116.90                                                     | 99.90             |
| %Mean $\pm$ %RSD  |                                                            |                                                            | 100.03 $\pm$ 1.70 |

\*Average of three determinations.
